# Supplementary material
Source: Springer Nature journal article supplement (https://www.springermedizin.de/resource/supplementary/12936_2010_1596_MOESM1_ESM.pdf/9541582)

**AMA1-C1 80ug**

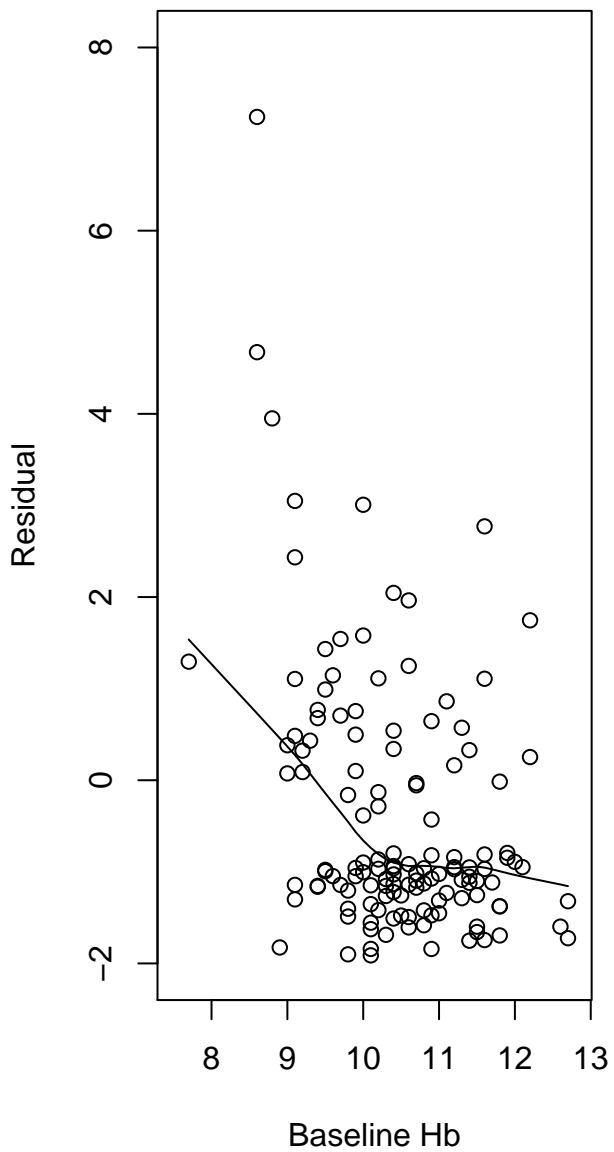

**Hiberix**

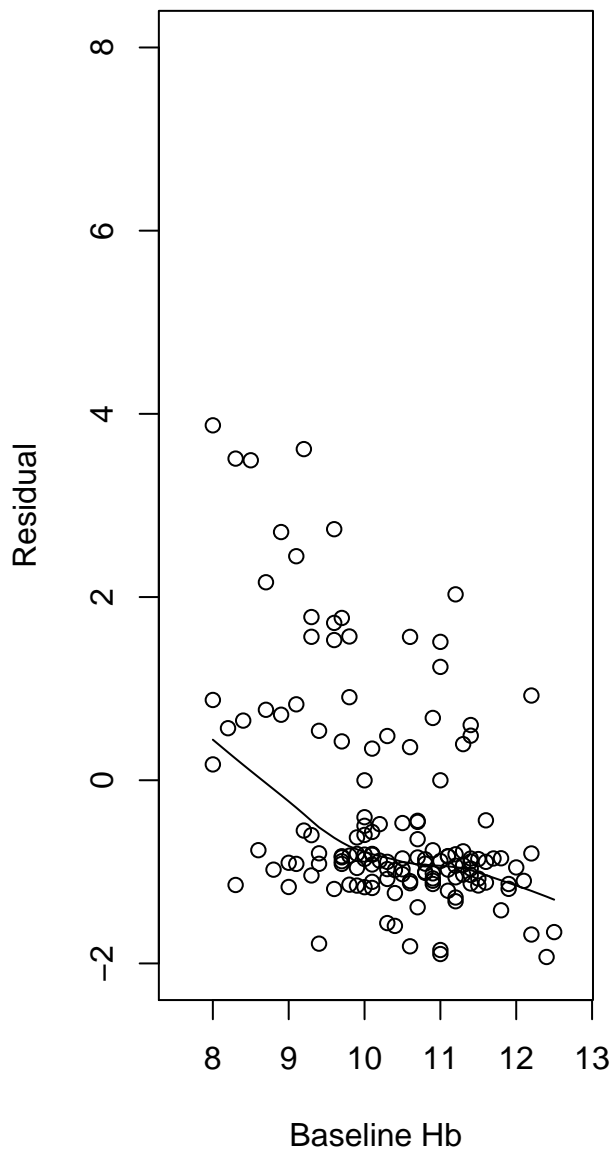

Supplement: MOESM1 [file 9541582]
